# Supplementary material for: Liquid–liquid interfacial self-assembled triangular Ag nanoplate-based high-density and ordered SERS-active arrays for the sensitive detection of dibutyl phthalate (DBP) in edible oils
Source: Royal Society of Chemistry journal article supplement (doi:10.1039/d1an00713k), 2021-01-01
Supplement: d1an00713k1.pdf [file d1an00713k1.pdf]

## Electronic Supporting Information (ESI)

**Liquid–liquid Interfacial self-assembled triangular Ag nanoplates-based high-density and ordered SERS-active arrays for sensitive detection of dibutyl phthalate (DBP) in edible oils**

**Shuling Xu,<sup>\*a</sup> Hefu Li,<sup>b</sup> Meng Guo,<sup>a</sup> Lei Wang,<sup>a</sup> Xia Li,<sup>a</sup> and Qingwang Xue<sup>\*a</sup>**

<sup>a</sup>School of Chemistry and Chemical Engineering, Liaocheng University, Liaocheng, 252059, China.

<sup>b</sup>School of physics science and information technology, Shandong key laboratory of optical communication science and technology, Liaocheng University, Liaocheng, 252059, China.

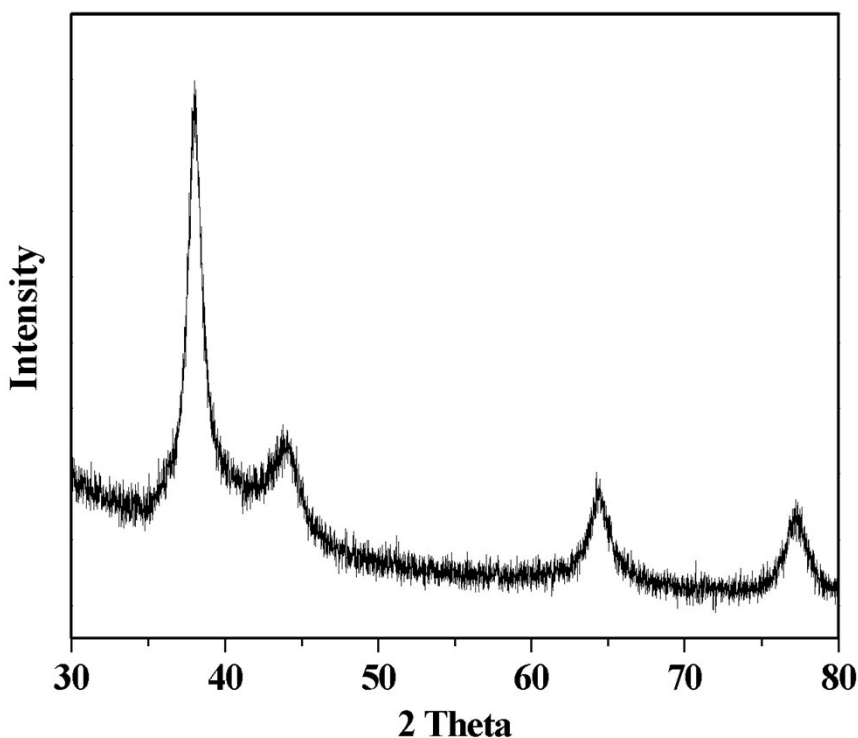

Fig. S1 XRD patterns of the TAgNPs

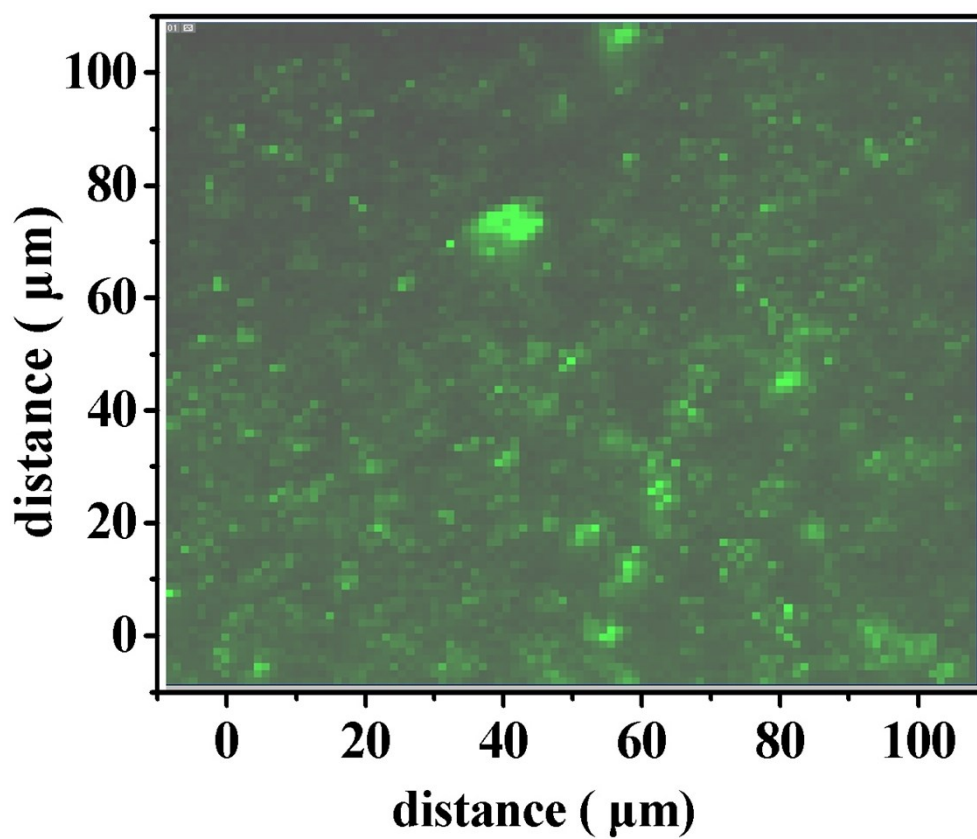

Fig. S2  $100 \times 100 \mu\text{m}^2$  Raman mapping (scanning step:  $1\mu\text{m}$ ) of R6G ( $10^{-5} \text{ M}$ ) at  $1360 \text{ cm}^{-1}$  peak, 1 s acquisition time.

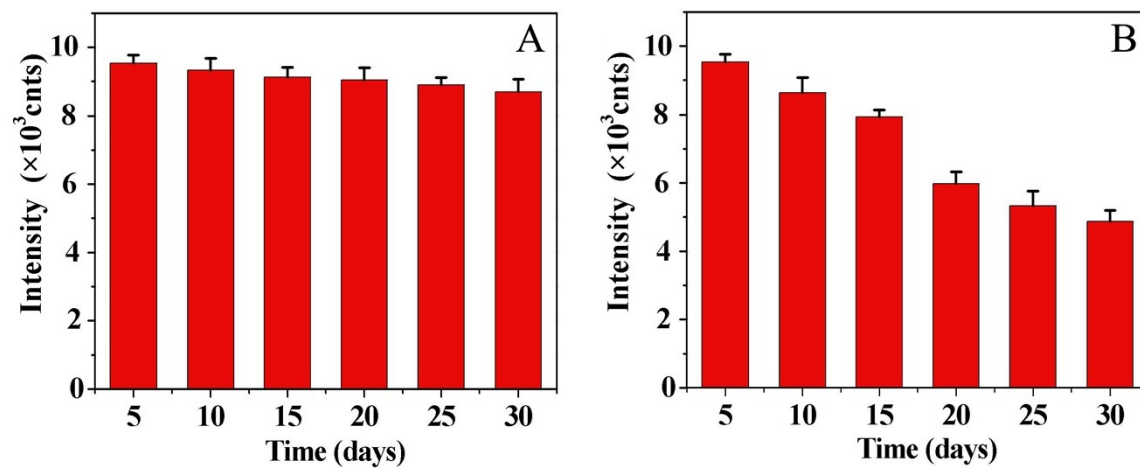

Fig . S3 SERRS intensity at 1360 cm<sup>-1</sup> of R6G (10<sup>-5</sup> M) on the TAgNPs arrays after TAgNPs was stored for one month: (A) in the form of TAgNPs colloid and (B) self-assembled TAgNPs arrays.

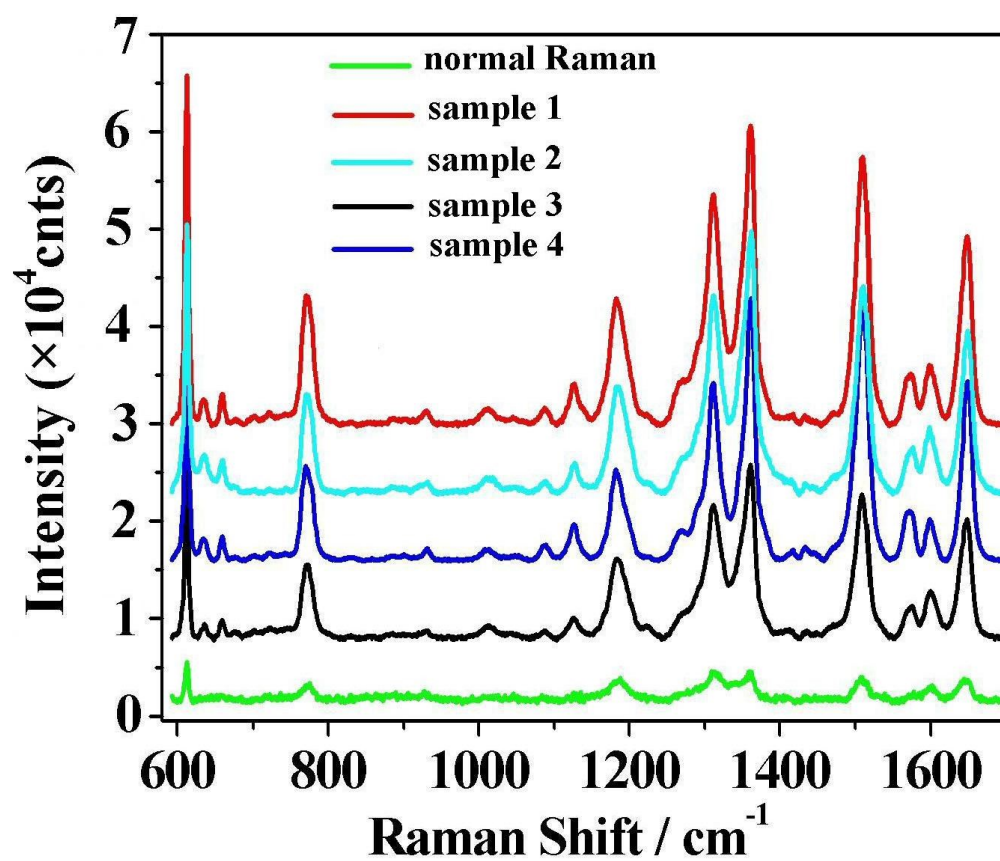

Fig. S4 The normal Raman spectrum (TNRS) and SERRS spectra of R6G ( $10^{-8}$  M) of different Ag samples arrays. The normal Raman data were collected using R6G solid. All the Raman spectra were recorded using 532 nm laser light and a collection time of 10 s.

The EF was calculated using the equation:

$$EF = \frac{I_{SERS}/N_{SERS}}{I_{NRS}/N_{NRS}}$$

$I_{SERS}$  and  $I_{NRS}$  represent the intensity of the same band of R6G (here,  $1360 \text{ cm}^{-1}$ ) of SERS spectrum and normal Raman spectrum, and  $N_{SERS}$  and  $N_{NRS}$  represent the corresponding molecules number of SERS spectrum and normal Raman spectrum in the focused incident laser spot.

R6G solid was directly tested to estimate the molecule number illuminated in the normal Raman characterization. The  $N_{NRS}$  has been estimated using the following relation:

$$N_{NRS} = Ah\rho N_A/M_W$$

A = Area of the laser spot

h = Confocal depth  $\sim 1.4 \text{ }\mu\text{m}$  for  $50\times$  objective lens

$\rho$  = Density of the R6G solid =  $0.79 \text{ g/cm}^3$  ( $20^\circ\text{C}$ )

$N_A$  = Avogadro number

$M_W$  = Molecular weight of R6G ( $479.01 \text{ g/mol}$ )

$N_{SERS}$  is calculated using the relation:

$$N_{SERS} = C_{SERS} V N_A A/A'$$

$C_{SERS}$  = Concentration of R6G at SERS measurement =  $1.0 \times 10^{-8} \text{ M}$

V = Volume of the R6G solution =  $25 \text{ }\mu\text{L}$

$N_A$  = Avogadro number

A = Area of the laser spot

$A' =$  Area of the R6G solution drop on the substrate  $\sim 1.9 \times 10^{-5} \text{ m}^2$  for 25  
 $\mu\text{L}$  solution

$$N_{\text{NRS}} / N_{\text{SERS}} \approx 3.1 \times 10^5$$

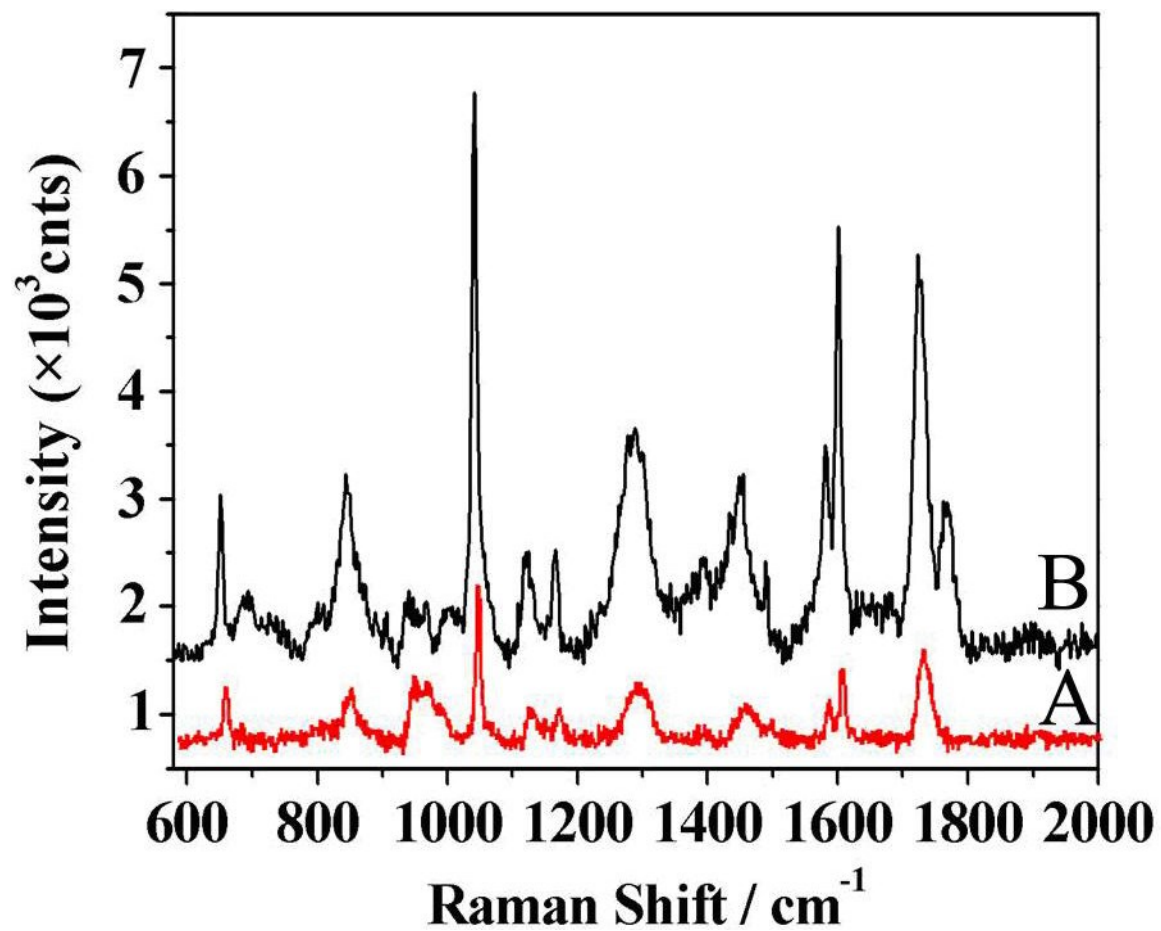

Fig. S5 (A) The normal Raman spectra of DBP. (B) SERS spectra of DBP using the TAgNPs arrays as substrate.

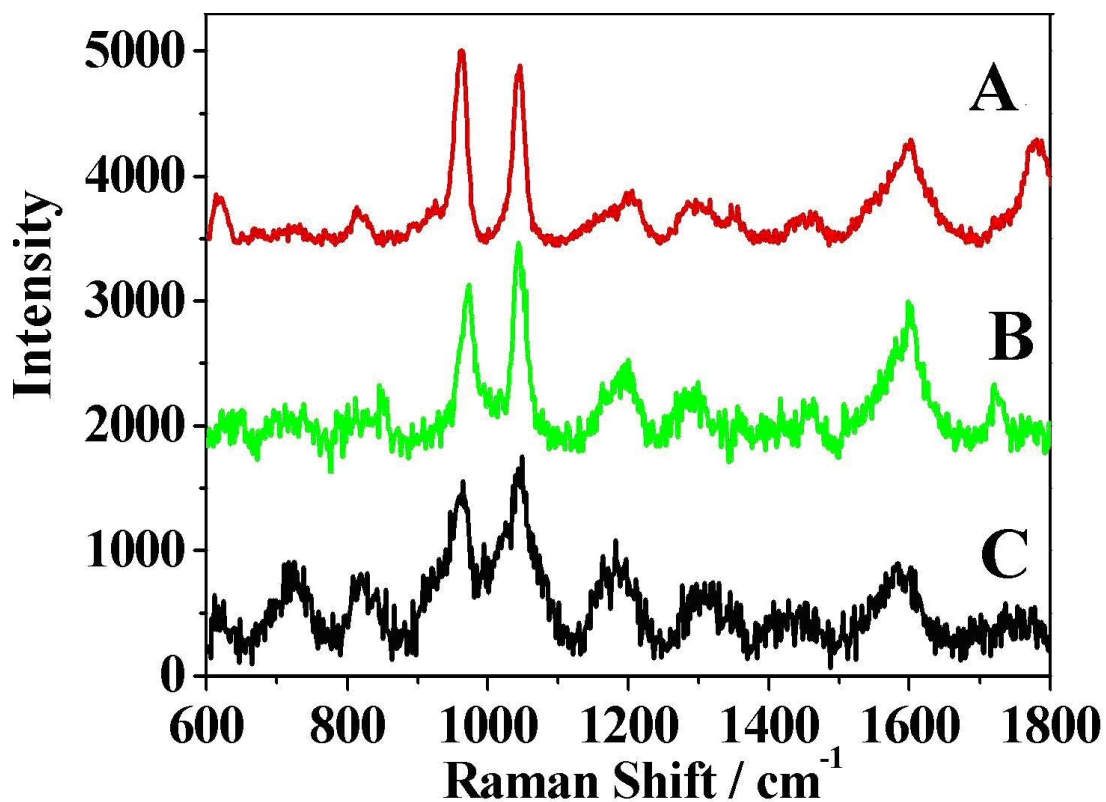

Fig. S6 (A) SERS spectra of DEP ( $10^{-6}$  M) on the TAgNPs arrays. (B) SERS spectra of DOP ( $10^{-6}$  M) on the TAgNPs arrays. (C) SERS spectra of mixtures of DEP, DOP and DBP on the TAgNPs arrays, each with a concentration of  $10^{-6}$  M.



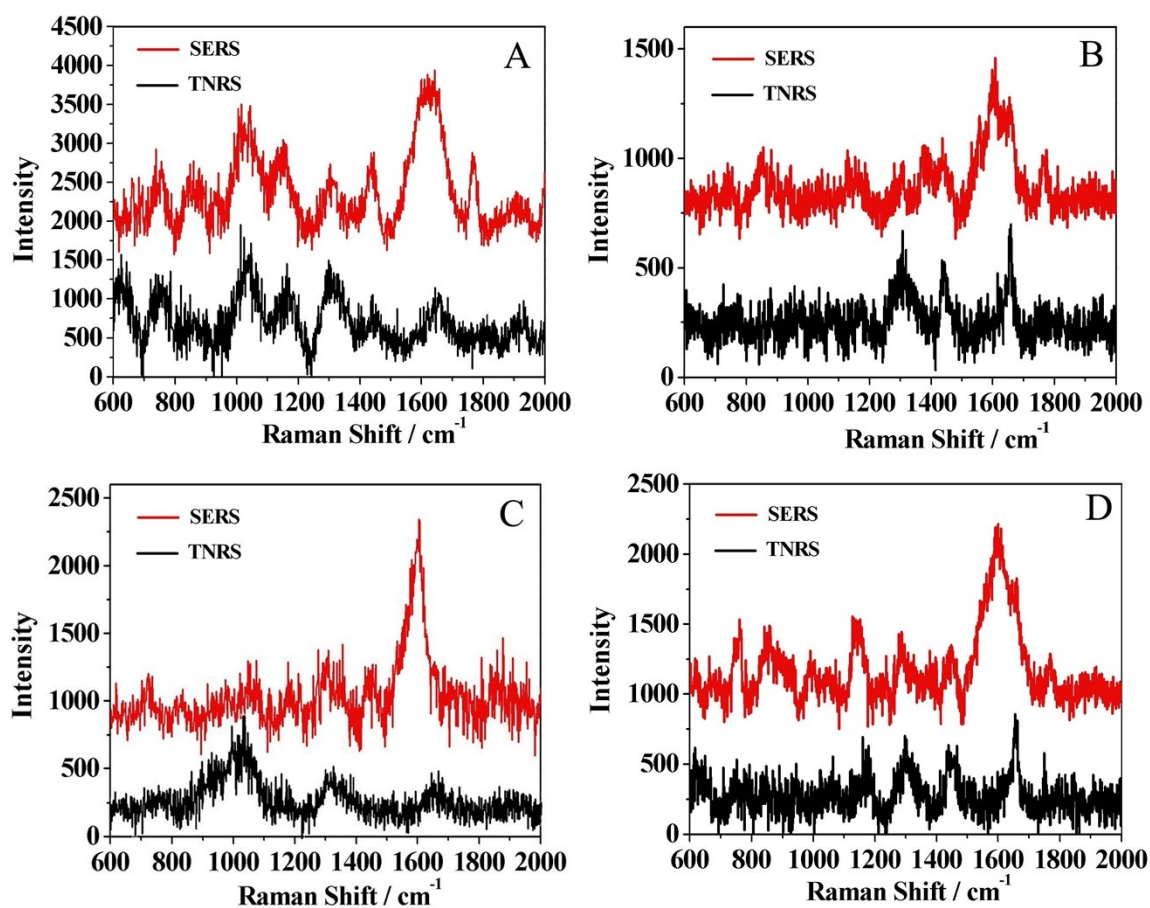

Fig. S7 The normal Raman spectrum (TNRS) and SERS of the (A) bean oil, (B) corn oil, (C) peanut oil and (D) sunflower oil on the TAgNPs arrays.

Table 1 Comparison of conventional methods for DBP detection in edible oils

| Method applied | Analytical range                           | LOD                       | Ref.      |
|----------------|--------------------------------------------|---------------------------|-----------|
| GC-MS          | 0.01-5.0 $\mu\text{g/mL}$                  | 0.39 $\mu\text{g /kg}$    | [1]       |
| HPLC           | 50-1000 $\text{ng g}^{-1}$                 | 8 $\text{ng g}^{-1}$      | [2]       |
| GC-MS          | 0.25-10.0 $\text{mg/L}$                    | 0.05 $\text{mg/L}$        | [3]       |
| GC-MS/MS       | 0.1-0.2 $\text{mg Kg}^{-1}$                | 149 $\mu\text{g kg}^{-1}$ | [4]       |
| SERS           | $5 \times 10^{-7}$ to $5 \times 10^{-5}$ M | $5 \times 10^{-7}$ M      | This work |

[1]. L. K. Shi, M. M. Zhang, Y. L. Liu, *Food Control*, 2017, **68**, 118-123.

[2]. Q. Xie, S. Liu, Y. Fan, J. Sun and X. Zhang, *Anal. Bioanal. Chem.*, 2014, **18**, 4563-4569.

[3]. P. Wu, Da. Yang, L. Zhang, X. Shen, X. Pan, L. Wang, J. Zhang, Y. Tan, L. Feng and Y. Ying, *J. Sep. Sci.*, 2012, **35**, 2932-2939.

[4]. B. Cavaliere, B. Macchione, G. Sindona and A. Tagarelli, *J. Chromatogr. A*, 2008, **1205**, 137-143.
